# Supplementary material for: A systematic method to identify modulation of transcriptional regulation via chromatin activity reveals regulatory network during mESC differentiation
Source: PubMed Central journal article supplement (PMC4780077; doi:10.1038/srep22656), 2016-03-07
Supplement: srep22656-s1.pdf [file srep22656-s1.pdf]

Supplementary Information

**A systematic method to identify modulation  
of transcriptional regulation via chromatin  
activity reveals regulatory network during  
mESC differentiation**

Zhana Duren and Yong Wang\*

Academy of Mathematics and Systems Science, National Center for  
Mathematics and Interdisciplinary Sciences, Chinese Academy of  
Sciences, Beijing 100190, China

\* Corresponding author:

Yong Wang, Email: [ywang@amss.ac.cn](mailto:ywang@amss.ac.cn)

## **Supplementary dataset legends**

**Supplementary dataset 1.** List of chromatin regulators.

**Supplementary dataset 2.** List of TF-target pairs with corresponding mutual information scores and p-values.

**Supplementary dataset 3.** List of CR-TF-TG triplets with mutual information, liquid association, phenotype and corresponding p-values.

**Supplementary dataset 4.** CR-CR network.

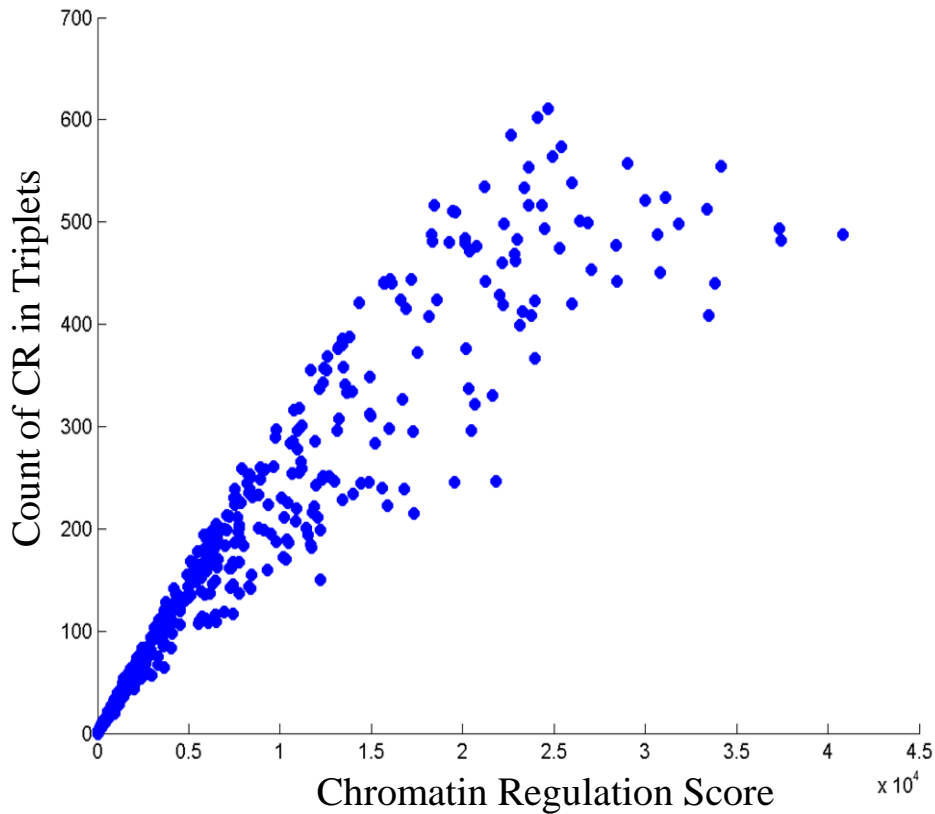

**Supplementary Figure 1.** Chromatin regulation score versus count of CR in triplets.

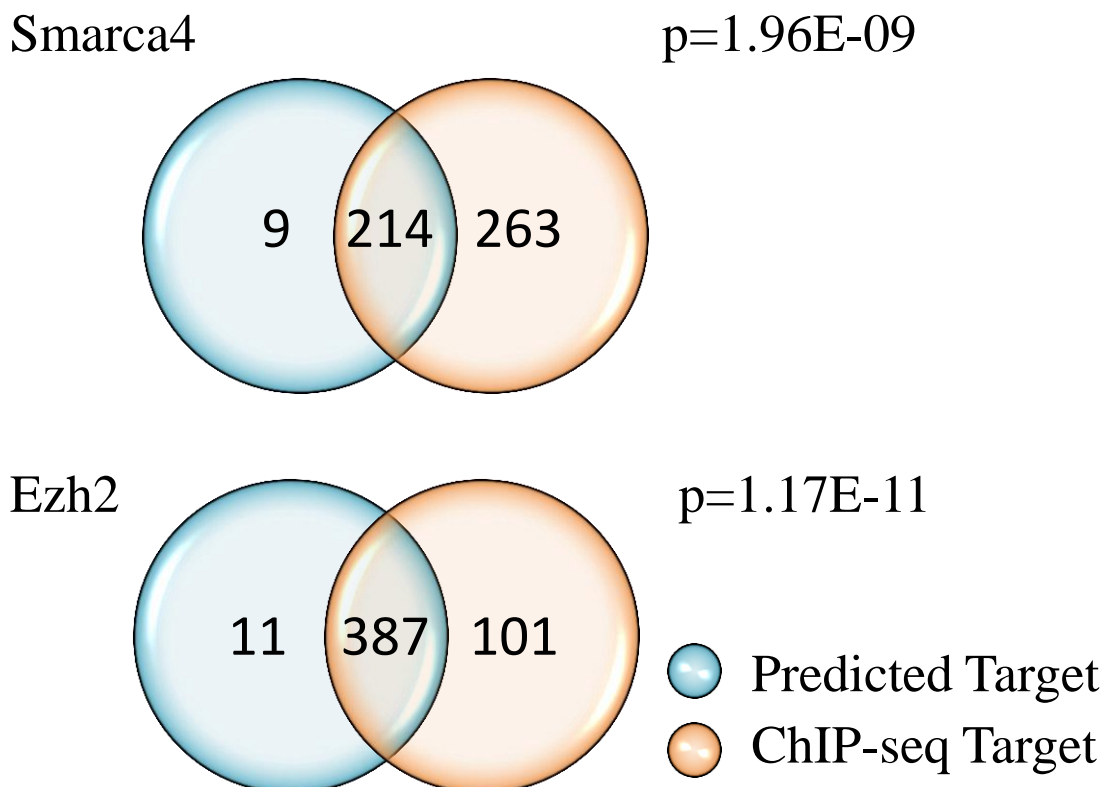

**Supplementary Figure 2.** Comparison of predicted CR target region and CRs' target region measured by ChIP-seq. We apply our method to predict target region on polycomb complex member Ezh2 and BAF complex member Smarca4 (BAF190) which have ChIP-seq data to compare in mESC. As a result, 214 out of 223 and 387 out of 498 target regions are validated by the Smarca4 and Ezh2 ChIP-seq data respectively. Both of these two overlapping are significant by hypergeometric test.

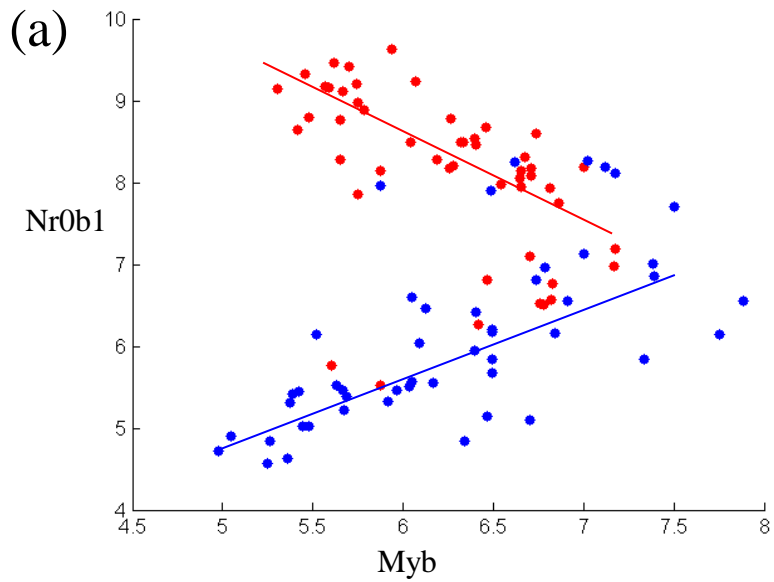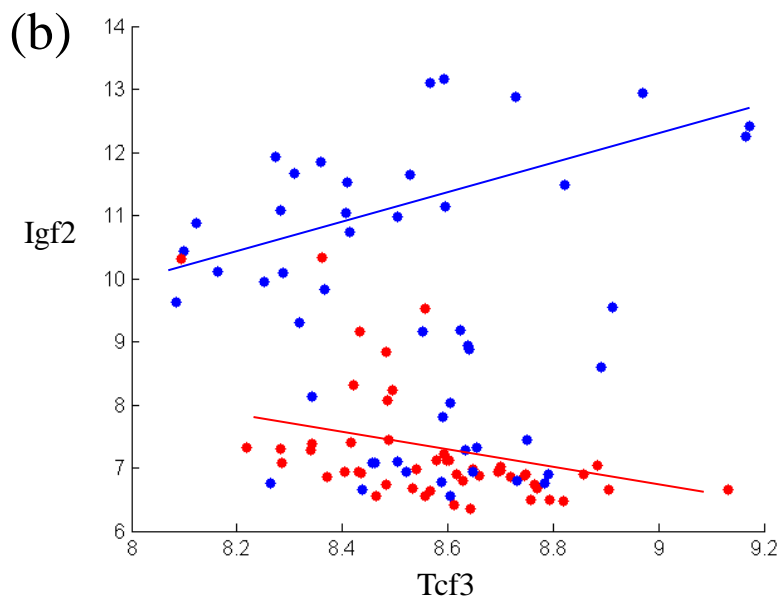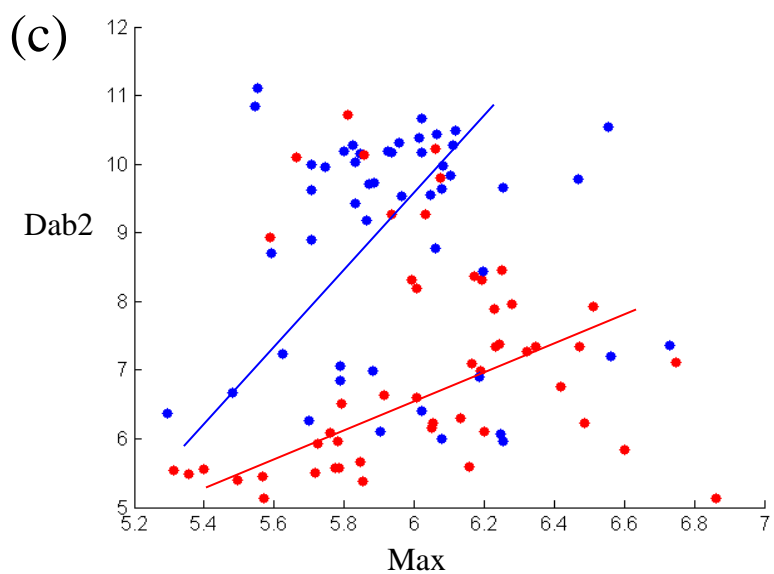

**Supplementary Figure 3.** Expression pattern of TF-TG changes dynamically during the stem cell differentiation. Red nodes represent the samples in pluripotent stage and blue nodes represent the samples in differentiated stage.
